# Supplementary material for: Mixtures of Conditional Gaussian Scale Mixtures Applied to Multiscale Image Representations
Source: PLOS journal article supplement (doi:10.1371/journal.pone.0039857), 2012-07-31
Supplement: S2 (10.1371/journal.pone.0039857.s002) [file journal.pone.0039857.s002]

## Appendix S2

To generate Figure 7 of the main text, we used a vertical Gaussian derivative filter,

$$f(x, y; \sigma) = \exp\left(-\frac{x^2 + y^2}{2\sigma^2}\right) x, \quad (1)$$

where in our experiments  $\sigma = 0.5$ . We repeatedly applied the filter at vertically offset locations  $(x, y)$  and  $(x, y+d)$  with a fixed distance  $d$  and recorded a pair of filter responses  $z \in \mathbb{R}^2$  at each location. The locations were picked uniformly at random. For each  $d$ , we modeled the distribution of filter responses using an  $L_p$ -spherically symmetric distribution [1], while using a Gamma distribution to model the radial component  $\|z\|_p$ . The density of the distribution is given by

$$g(z; p, k, \theta) = \frac{p^{n-1}\Gamma(n/p)}{2^n\Gamma(1/p)^n} \frac{1}{\|z\|_p^{n-1}} \gamma(\|z\|_p; k, \theta) \quad (2)$$

$$= \frac{p^{n-1}\Gamma(n/p)}{2^n\Gamma(1/p)^n} \frac{1}{\|z\|_p^{n-1}} \frac{1}{\theta^k} \frac{1}{\Gamma(k)} \|z\|_p^{k-1} \exp\left(-\frac{\|z\|_p}{\theta}\right). \quad (3)$$

$\Gamma$  is the gamma function,  $\gamma(r; k, \theta)$  is the density of the Gamma distribution with shape parameter  $k$  and scale parameter  $\theta$  and  $n = 2$  is the dimensionality of  $z$ . Using maximum likelihood learning, we fitted all three parameters to the distribution of filter responses before recording the parameter  $p$  of the  $L_p$ -norm.

## References

- [1] Gupta AK, Song D (1997)  $L_p$ -norm spherical distribution. *Journal of Statistical Planning and Inference* 60: 241–260.
